# Supplementary material for: Fast and High-Efficiency Synthesis of Capsanthin in Pepper by Transient Expression of Geminivirus
Source: MDPI journal article supplement (doi:10.3390/ijms241915008), 2023-10-09
Supplement: s1 [file s1]

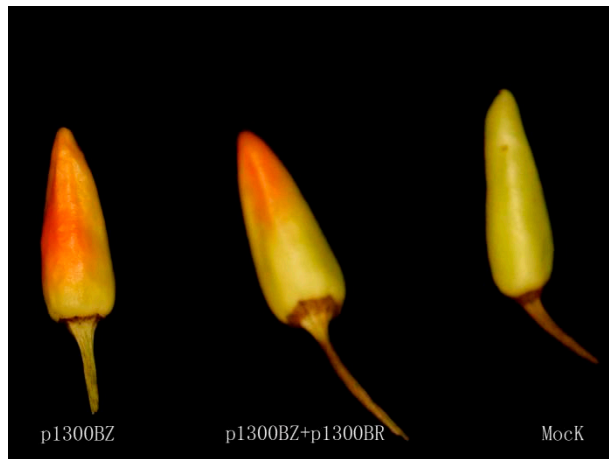

**Figure S1.** The phenotypic observation of p1300BZ, p1300BZ+p1300BR, with Mock as a control.

**Table S1.** Amino acid and DNA sequences of studied genes and promoters.

| Name                                   | Sequence                                                                                                                                                                                                                                                                                                                                                                                                                                                                                                                                       |
|----------------------------------------|------------------------------------------------------------------------------------------------------------------------------------------------------------------------------------------------------------------------------------------------------------------------------------------------------------------------------------------------------------------------------------------------------------------------------------------------------------------------------------------------------------------------------------------------|
| <i>CrtW</i> gene (Amino acid sequence) | MTAAVAEPRIVPRQTWIGLTLAGMIVAGWGS�HVYGVYFHRWGTSS<br>LVIVPAIVAVQTWLSVGLFIVAHDA MHGSLAPGRPRLNAAVGRLTL<br>GLYAGFRFDRLKTAHHAHHAAPGTADDPDFYAPAPRAFLPWFLNF<br>FRTYFGWREMAVLTA LVIALFGLGARPANLLTFWAAPALLSALQLF<br>TFGTWLP HRHTDQPFADAH HARSSGYGPVLSLLTCFHFG RHHEHHL<br>TPWRPWWRLWRGES                                                                                                                                                                                                                                                                   |
| <i>CrtW</i> gene (Optimized sequence)  | ATGGCTTGGTTAACATGGATTGCATTGTTTCTTACTGCATTTCTTG<br>GAATGGAAGCATTGCTTGGATTATGCATAGATATGTGATGCAT<br>GGATTTCTTTGGAGTTGGCATAGGTCACATCATGAACCACATGAT<br>CATCCTTTAGAAAAAATGATTTATTTGCTGTTATTTTGGCTGCTC<br>CAGCAATTGTTATGGTGGCAGTGGGACTTCATCTTTGGCCTTGGG<br>CACTTCCAGTGGGTTTAGGTATTACAGCTTATGGTATGGTGTATT<br>TTTTTTTTCATGATGGACTTGTGCATAGGAGGTTTCCTACAGGATT<br>TAGTGGTAGATCAGGATTTTGGACAAGGCGTATACAAGCACATA<br>GGCTTCATCATGCAGTGAGAACTAGAGAAGGTTGTGTGTCATTT<br>GGTTTCTTTGGGTGAGGTCTGCTAGAGCACTTGAAGCTGAATTA<br>GCTCAAAAAAGGGGAAGTAGTAGTTCAGGAGCTTAATGA |
| <i>CrtZ</i> gene (Amino acid sequence) | MAWLTWIALFLTAFLGMEAFAWIMHRYVMHGFLWSWHRSHHEPH<br>DHPLEKNDLFAVIFAAPAIVMVA VGLHLWPWALPVGLGITAYGMVYF<br>FFHDGLVHRRFPTGFSGRSGFWTRRIQAHRLHHAVRTREGCVSFGFL<br>WVRSARALEAELAQKRGSSSSGA                                                                                                                                                                                                                                                                                                                                                                 |
| <i>CrtZ</i> gene (Optimized sequence)  | ATGGCTTGGTTAACATGGATTGCATTGTTTCTTACTGCATTTCTTG<br>GAATGGAAGCATTGCTTGGATTATGCATAGATATGTGATGCAT<br>GGATTTCTTTGGAGTTGGCATAGGTCACATCATGAACCACATGAT<br>CATCCTTTAGAAAAAATGATTTATTTGCTGTTATTTTGGCTGCTC                                                                                                                                                                                                                                                                                                                                                |

|                        |                                                                                                                                                                                                                                                                                                                                                                                                                                                                                                                                                                                                                                                                                                                                                                                                                                                                                                                                                                                                                                                                                                                                                                                      |
|------------------------|--------------------------------------------------------------------------------------------------------------------------------------------------------------------------------------------------------------------------------------------------------------------------------------------------------------------------------------------------------------------------------------------------------------------------------------------------------------------------------------------------------------------------------------------------------------------------------------------------------------------------------------------------------------------------------------------------------------------------------------------------------------------------------------------------------------------------------------------------------------------------------------------------------------------------------------------------------------------------------------------------------------------------------------------------------------------------------------------------------------------------------------------------------------------------------------|
|                        | CAGCAATTGTTATGGTGGCAGTGGGACTTCATCTTTGGCCTTGGG<br>CACTTCCAGTGGGTTTAGGTATTACAGCTTATGGTATGGTGTATT<br>TTTTTTTTCATGATGGACTTGTGCATAGGAGGTTTCCTACAGGATT<br>TAGTGGTAGATCAGGATTTTGGACAAGGCGTATACAAGCACATA<br>GGCTTCATCATGCAGTGAGAACTAGAGAAGGTTGTGTGTCATTT<br>GGTTTTCTTTGGGTGAGGTCTGCTAGAGCACTTGAAGCTGAATTA<br>GCTCAAAAAAGGGGAAGTAGTAGTTCAGGAGCTTAATGA                                                                                                                                                                                                                                                                                                                                                                                                                                                                                                                                                                                                                                                                                                                                                                                                                                         |
| 35 S promoter sequence | TGAGACTTTTCAACAAAGGGTAATATCCGGAACCTCCTCGGAT<br>TCCATTGCCCAGCTATCTGTCACTTTATTGTGAAGATAGTGAAAA<br>AGGAAGGTGGCTCCTACAAATGCCATCATTGCGATAAAGGAAA<br>GGCCATCGTTGAAGATGCCTCTGCCGACAGTGGTCCCAAAGATG<br>GACCCCCACCCACGAGGAGCATCGTGAAAAAGAAGACGTTCC<br>AACCACGTCTTCAAAGCAAGTGGATTGATGTGATATCTCCACTG<br>ACGTAAGGGATGACGCACAATCCCACTATCCTTCGCAAGACCCT<br>TCCTCTATATAAGGAAGTTCATTTCAATTTGGAGAGGAC                                                                                                                                                                                                                                                                                                                                                                                                                                                                                                                                                                                                                                                                                                                                                                                                 |
| rbcs promoter sequence | TGTGGGAACGAGATAAGGGCGAAGTGCGCTAGTAGCCTGCTATT<br>TAAAATATATCCACAATTTATAATGTATTTGAAGATTAGTCAATT<br>CGTCCAAAATTCAGGACTAAGTATCTTGAATTTTTGTATCCTGAA<br>TTTTGGGGCTACTAATTTGGAACCTCAGGACTTAATGTCCTAAATT<br>TTTGAGCCGCTAATTTGAAATTCAGGACTAAGTGTTTTGAATTTTT<br>GAACTGCTTATTCGAAATGCAAGACTAAGTGACATGGATTTTTG<br>AACTGCTAATTTAATATTCAGGACATAAGATTCTGAATTTTCAGAC<br>ATAATTTTTTAACCTTAGGGCACGATGTCCTGAAGTTTGAATCTT<br>GAGGTCTAAACTTCAAGATGCAGCGTCTTGAAGTTTAAAGTGAAC<br>TGGCTAATCTTTAAATACTTGTAAACTGTGGATACATTTTTAAAT<br>AATATATTTAAAAGCGGTACCTGGTATCATCTTCACGAGAATTT<br>TCCAAGTTAATTGTAAAGGAAATAGTGGTGTTGCATCAAGTTAT<br>GGACAATATAAGGAAGCAAACAGTACTCTAGCTATCAAATTAGT<br>TTCCACTTCTAAACCATGAATATTAGGAAAAACAAGAAACAAA<br>ACAAATATACATAAACAATACGGCTAAAGCCCAAGGAAAAGGG<br>ACTCTAAAAAAATTAACCAACCTCAATCACACATTCATATCCTC<br>TTCTACCTCATCTAGGATGAGATAAGATTACTGAGGTGCTTACA<br>CGTGGCACCTCCATTGTGGTGACTAAATGAAGAGTGGCTTAGCT<br>CAAAATATAATTTCCAACCTTTCATGTGTGGATATTAAGTTTTGT<br>GTAGTGAATCAAGAACCACATAATCCAATGGTTAGCTTTATTCC<br>AAGATGAGGGGGTTGTTGATTTTTGTCCGTCAGATATAGGAAAT<br>ATGTAAAACCTTATCATTATATATAGGGTGGTGGGCAACTATGC<br>AATGACCATATTGGAAGTTAAAGGAAAAGAGAGAAAGAGAAAT<br>CTTCTGAATCGTCGACCTGCAGGCATG |
| TP sequence            | TGGCTTCCTCTGTCATTTCTTCAGCAGCTGTTGCCACACGCAGCA<br>ATGTTACACAAGCTAGCATGGTTGCACCTTTCAGTGGTCTCAAAT<br>CTTCAGCCACTTTCCCTGTTACAAAGAAGCAAAACCTTGACATC<br>ACTTCCATTGCTAGCAATGGTGGAAGAGTTAGCTGC                                                                                                                                                                                                                                                                                                                                                                                                                                                                                                                                                                                                                                                                                                                                                                                                                                                                                                                                                                                               |
| p1300BGFP              | CGATCGGTGCGATTCATAGAAGATTAGATTTTTTCATAGTATTTTTTT                                                                                                                                                                                                                                                                                                                                                                                                                                                                                                                                                                                                                                                                                                                                                                                                                                                                                                                                                                                                                                                                                                                                     |

---

AAAGTAAACCTTTAACTACGGTTAGGACACTTTTAAAGTTAAATTT  
AATTTGAACCCCTTAAATTAATTTTTTAAAATAGATAAATATCAATC  
ATCCTGATATGCTTTTGAAAAAATGAATGAGAAAGATGATTCAA  
TTAAGGCCACATTTTAAATCATGACTAAAATAATATACAGTATAAT  
TTCATATATATTTGCTTTAAAAAAAATTGACAATCCATTTCGTTT  
CTAGCAATAAAATTTCTTCAACCACAAATATATTAAGATAACTA  
CGGCATAGAAACAAAAATCTATGAAGAATTTTTGTATACTTCAT  
ATGAAATTAAAAAAACTTCATTGAACATCAAAATAATAATAAT  
AATCATAAACTCCTCAATATTTATATTCCTAGCTTCTTGAATTAA  
ATTGTTTACATATTCAACGATGTAAAAAATTATTTCTCTATCTATT  
TTCCTTATATCATGCATGGTTTCACATATATCAAAGGATAAAAGC  
AATCTATGTAAATTATCTCACTTTATTAAGTTTTCTATCTGAATTA  
TTGAGAACGTAGATTTCTTTTTGCACTATCCCCCAATAATTAGCA  
AAACACACCTAGACTAGATTTGTTTTGCTAACCCAATTGATATTA  
ATTATATATGATTAATATTTATATGTATATGGAATTGGTTAATAA  
AATGCATCTGGTTCATCAAAGAATTATAAAGACACGTGACATTC  
ATTTAGGATAAGAAATATGGATGATCTCTTTCTCTTATTCAGATA  
ATTAGTAATTACACATAACACACAACCTTGATGCCACATTATA  
GTGATTAGCATGTCACATATGTGTGCATCCTTTTATTTACATACATTA  
ATTAACCTGGCCAATCCAGAAGATGGACAAGTCTAGGGTCACAT  
TGCAGGGTACTCTAGCTTACTCGCCTTCTTTTTCGAAGGTTTGAGT  
ACCTTCAGGGCATCCTCTTGATACATTACTTTCCACTTCGATTGG  
GGCAAGCTGTAGCAGTTCTTGCTTAGACCGAATTGCCATCTCACA  
GAGATGCTGAAGAGTTCGCGACCCTCCAGAAACGGTGATACTAA  
CTCCTCGAAACCGAATACTATAGGTACATCCGATCTGGTCGAAA  
CCGAAAAATCGAGATGCTGCATAGTTAACCGAATCTCCCGTCCA  
AGATCCAAGGACTCTGTGCAGTGAAGCTTCCGTCTGTCTATCT  
GAGATATCTCTTAAATACAACCTTTCCCGAAACCCAGCTTTCTTT  
GAAACCAAGGGGATTATCTTGATTCTGAATTCGTCTCATCGTTATG  
TAGCCGCCACTCAGTCCAACCTCGGACTTTCGTCAGGAAGTTTGA  
AGGGAGAAGTTGTACCTCCTGATCCTCCATCCCAACGTTCACTGT  
TAGCTTGTTCCCTAGCGTCGTTTCTTGTATAGCTCGTTCCATGGA  
TTGTAAATAGTAATTGTAATGTTGTTTGTGTTGTTGTTGTTGGT  
AATTGTTGTAAAAATACGCTCTCCAAATGAAATGAACTTCCTTAT  
ATAGAGGAAGGGTCTTGCGAAGGATAGTGGGATTGTGCGTCATC  
CCTTACGTCAGTGGAGATATCACATCAATCCACTTGCTTTGAAGA  
CGTGGTTGGAACGTCTTCTTTTTCCACGATGCTCCTCGTGGGTGG  
GGGTCCATCTTTGGGACCACTGTCGGCAGAGGCATCTTCAACGA  
TGGCCTTTCCTTTATCGCAATGATGGCATTGTAGGAGCCACCTT  
CCTTTTCCACTATCTTACATAAAAGTGACAGATAGCTGGGCAAT  
GGAATCCGAGGAGGTTTCCGGATATTACCCTTTGTTGAAAAGTCT  
CAATTGCCCTTTGGTCTTCTGAGACTGTATCTTTGATATTTTTGGA  
GTAGACAAGTGTGTCGTGCTCCACCATGTTCTGGCAATCCGGTT  
CGCTTGCTGTCCATAAAACCGCCCAGTCTAGCTATCGCCATGTAA

---

GCCCACTGCAAGCTACCTGCTTTCTCTTTGCGCTTGCGTTTTCCCT  
TGTCCAGATAGCCCAGTAGCTGACATTCATCCGGGGTCAGCACC  
GTTTCTGCGGACTGGCTTTCTACGTGTTCCGCTTCCTTTAGCAGCC  
CTTGCGCCCTGAGTGCTTGCGGCAGCGTGAAGCTGGCGCGCCGC  
TCTAGCAGAAGGCATGTTGTTGTGACTCCGAGGGGTGCCTCAA  
ACTCTATCTTATAACCGGCGTGGAGGCATGGAGGCAAGGGCATT  
TTGGTAATTTAAGTAGTTAGTGGAATGACGTCATTTACTTAAA  
GACGAAGTCTTGCGACAAGGGGGGCCACGCCGAATTTTAATAT  
TACCGGCGTGGCCCCACCTTATCGCGAGTGCTTTAGCACGAGCG  
GTCCAGATTTAAAGTAGAAAAGTTCCCGCCCCTAGGGTTAAAG  
GTGTTCACTATAAAAAGCATATACGATGTGATGGTATTTGATGG  
AGCGTATATTGTATCAGGTATTTCCGTCGGATACGAATTATTCGT  
ACGACCCTCCTGCAGGcatcacctaaaaccgtgaacggtgtcggggaactcatttaaca  
gtggatccacaTTtTTcaaacgcatacttagcaacgaagtacttataataagcgggagaattatttA  
agCTTTGAGCGCgtcatatgattggccgacaagagtaatggtagggccacaaaaaatcgc  
gcgccatccggaatattatacggatggccgcttttggAACCCAAAGGgaatttgaaTTT  
CAAAcCaacttctagttatttacagaatatgccatttgagacactataaattgtatccagctccaat  
tcccagagtaaaagcccatcagttgtctctaattgaccaaagtcaCTCGAGAAACAAACA  
AAATCAACAAATATAGAAAATAACGCATTTCCAATTCTTTGAAA  
TTTCTGCAACATCTAGAACAATGGTGAGCAAGGGCGAGGAGCTG  
TTCACCGGGGTGGTGCCCATCCTGGTCGAGCTGGACGGCGACGT  
AAACGGCCACAAGTTCAGCGTGTCCGGCGAGGGCGAGGGCGAT  
GCCACCTACGGCAAGCTGACCCTGAAGTTCATCTGCACCACCGG  
CAAGCTGCCCCGTGCCCTGGCCCCACCCTCGTGACCACCTTCAGCT  
ACGGCGTGCAGTGCTTCAGCCGCTACCCCGACCACATGAAGCAG  
CACGACTTCTTCAAGTCCGCCATGCCCCAAGGCTACGTCCAGGA  
GCGCACCATCTTCTTCAAGGACGACGGCAACTACAAGACCCGCG  
CCGAGGTGAAGTTCGAGGGCGACACCCTGGTGAACCGCATCGA  
GCTGAAGGGCATCGACTTCAAGGAGGACGGCAACATCCTGGGG  
CACAAGCTGGAGTACAACACAACAGCCACAACGTCTATATCAT  
GGCCGACAAGCAGAAGAACGGCATCAAGGTGAAGTTCAGATC  
CGCCACAACATCGAGGACGGCAGCGTGCAGCTCGCCGACCACT  
ACCAGCAGAACACCCCCATCGGCGACGGCCCCGTGCTGCTGCCC  
GACAACCACTACCTGAGCACCCAGTCCGCCCTGAGCAAAGACC  
CCAACGAGAAGCGCGATCACATGGTCCTGCTGGAGTTCGTGACC  
GCGCCGGGATCACTCACGGCATGGACGAGCTGTACAAGTAAG  
AGCTCGAAGTGACATCACAAAGTTGAAGGTAATAAAGCCAAAT  
TAATTAAGACATTTTCATAATGATGTCAAGAATGCAAAGCAAAT  
TGCATAACTGCCTTTATGCAAAACATTAATATAATATAAATTATA  
AAGAACTGCGCTCTCTGCTTCTTATTTTCTTAGCTTCATTTATTAG  
TCACTAGCTGTTCAGAAATTTTCAGTATCTTTTGATATTACTAAGA  
ACCTAATCACACAATGTATATTCTTATGCAGGAAAAGCAGAATG  
CTGAGCTAAAAGAAAGGCTTTTTCCATTTTCGAGAGACAATGAG  
AAAAGAAGAAGAAGAAGAAGAAGAAGAAGAAGAAGAAGAAGA

---

GTAAATAATAAAGCCCCACAGGAGGCGAAGTTCTTGTAGCTCCA  
TGTTATCTAAGTTATTGATATTGTTTGCCCTATATTTTATTTCTGTC  
ATTGTGTATGTTTTGTTTCAGTTTCGATCTCCTTGCAAAATGCAGAG  
ATTATGAGATGAATAAACTAAGTTATATTATTATACGTGTTAATA  
TTCTCCTCCTCTCTCTAGCTAGCCTTTTGTTTTCTCTTTTCTTATTT  
GATTTTCTTTAAATCAATCCATTTTAGGAGAGGGCCAGGGAGTG  
ATCCAGCAAAACATGAAGATTAGAAGAACTTCCCTCTTTTTTTT  
CCTGAAAACAATTTAACGTTCGAGATTTATCTCTTTTGTAAATGGA  
ATCATTCTACAGTTATGACGAATTGTACATCAACGAAAAATTA  
GTCAAACGACTAAAATAAATAAATATCATGTGTTATTAAGAAAA  
TTCTCCTATAAGAATATTTTAATAGATCATATGTTTGTAAAAAAA  
ATTAATTTTTACTAACACATATATTTACTTATCAAAAATTTGACA  
AAGTAAGATTAAAATAATATTCATCTAACAAAAAAAAAACCCAG  
AAAATGCTGAAAACCCGGCAAAACCGAACCAATCCAAACCGAT  
ATAGTTGGTTTGGTTTGATTTTGATATAAACCGAACCAACTCGGT  
CCATTTGCACCCCTAATCATAATAGCTTTAATATTTCAAGATATT  
ATTAAGTTAACGTTGTCAATATCCTGGAAATTTGCAAAATGAAT  
CAAGCCTATATGGCTGTAATATGAATTTAAAGCAGCTCGATGT  
GGTGGTAATATGTAATTTACTTGATTCTAAAAAAATATCCCAAGT  
ATTAATAATTTCTGCTAGGAAGAAGGTTAGCTACGATTTACAGC  
AAAGCCAGAATACAAAGAACCATAAAGTGATTGAAGCTCGAAA  
TATACGAAGGAACAAATATTTTAAAAAAATACGCAATGACTTG  
GAACAAAAGAAAGTGATATATTTTTTGTTCTTAAACAAGCATCC  
CCTCTAAAGAATGGCAGTTTTCTTTGCATGTAACCTATTATGCTC  
CCTTCGTTACAAAAATTTGGACTACTATTGGGAACCTCTTCTGA  
AAATAGTGGTACCGAGTGTAATTCAAGTCAGTTGGAAATCAATA  
AAATGATTATTTTATGAATATATTTTATTGTGCAAGTAGATAGAA  
ATTACATATGTTACATAACACACGAAATAAACAAAAAAACACA  
ATCCAAAACAAACACCCCAAACAAAATAAACTATATATATCCT  
CGTATGAGGAGAGGCACGTTTCAGTGACTCGACGATTTCCCGAGCA  
AAAAAAGTCTCCCGTCACACATATAGTGGGTGACGCAATTATC  
TTCAAAGTAATCCTTCTGTTGACTTGTGATTGATAACATCCAGTCT  
TCGTCAGGATTGCAAAGAATTATAGAAGGGATCCCACCTTTTATT  
TTCTTCTTTTTTCCATATTTAGGGTTGACAGTGAAATCAGACTGGC  
AACCTATTAATTGCTTCCACAATGGGACGAACCTGAAGGGGATG  
TCGTCGATGATATTATAGGTGGCGTGTTTCATCGTAGTTGGTGAAG  
TCGATGGTCCCGTTCCAGTAGTTGTGTCGCCCCGAGACTTCTAGCC  
CAGGTGGTCTTTCCGGTACGAGTTGGTCCGCAGATGTAGAGGCT  
GGGGTGTCTGACCCAGTCCTTCCCTCATCCTGGTTAGATCGGCC  
ATCCACTCAAGGTCAGATTGTGCTTGATCGTAGGAGACAGGATG  
TATGAAAGTGTAGGCATCGATGCTTACATGATATAGGTGCGTCTC  
TCTCCAGTTGTGCAGATCTTCGTGGCAGCGGAGATCTGATTCTGT  
GAAGGGCGACACGTACTGCTCAGGTTGTGGAGGAAATAATTTGT  
TGGCTGAATATTCCAGCCATTGAAGCTTTGTTGCCCATTCATGAG

---

GGAAC TCTTCTTTGATCATGTCAAGATACTCCTCCTTAGACGTTG  
CAGTCTGGATAATAGTTCGCCATCGTGCGTCAGATTTGCGAGGA  
GACACCTTATGATCTCGGAAATCTCCTCTGGTTTTAATATCTCCGT  
CCTTTGATATGTAATCAAGGACTTGTTTAGAGTTTCTAGCTGGCT  
GGATATTAGGGTGATTCCTTCAAATCGAAAAAGAAGGATCC  
CTAATACAAGGTTTTTTATCAAGCTGGATAAGAGCATGATAGTG  
GGTAGTGCCATCTTGATGAAGCTCAGAAGCAACACCAAGGAAG  
AAAATAAGAAAAGGTGTGAGTTTCTCCCAGAGAACTGGAATA  
AATCATCTCTTTGAGATGAGCACTTGGGGTAGGTAAGGAAAACA  
TATTAGATTGGAGTCTGAAGTTCTTGCTAGCAGAAGGCATGTTG  
TTGTGACTCCGAGGGGTGCCTCAAAC TCTATCTTATAACCGGCG  
TGGAGGCATGGAGGCAAGGGCATT TTTGGTAATT AAGTAGTTAG  
TGGAAAATGACGTCATTTACTTAAAGACGAAGCTTGCGACAAG  
GGGGGCCACGCCGAATTTTAATATTACCGGCGTGCCCCACCT  
TATCGCGAGTGCTTTAGCACGAGCGGTCCAGATTTAAAGTAGAA  
AAGTTCCCGCCCACTAGGGTTAAAGGTGTTCACTATAAAAGC  
ATATACGATGTGATGGTATTTGATGGAGCGTATATTGTATCAGGT  
ATTTCCGTCCGATACGAATTATTCGTACGGCCGGACCGGTCCCCT  
AGGCCGGCCAATTCGAGATCGGCTGAGTGGCTCCTTCAATCGTT  
GCGGTTCTGT CAGTTCCAAACGTAAAACGGCTTGTC CCGCGTCAT  
CGGCGGGGGTCATAACGTGACTCCCTTAATTCTCCGCTCATGATC  
AGATTGTCGTTTCCCGCCTTCAGTTTAAACTATCAGTATCAGTGTT  
TGACAGGATATATTGGCGGGTAAACCTAAGAGAAAAGAGCGTTT  
ATTAGAATAACGGATATTTAAAAGGGCGTGAAAAGGTTTATCCG  
TTCGTCCATTTGTATGTGCATGCCAACCACAGGGTTCCCCTCGGG  
ATCAAAGTACTTTGATCCAACCCCTCCGCTGCTATAGTGAGTCG  
GCTTCTGACGTT CAGTGCAGCCGTCTTCTGAAAACGACATGTCG  
ACAAGTCCTAAGTTACGCGACAGGCTGCCGCCCTGCCCTTTTCT  
GGCGTTTTCTTGTCGCGTGTTTTAGTCGCATAAAGTAGAATACTT  
GCGACTAGAACCGGAGACATTACGCCATGAACAAGAGCGCCGC  
CGCTGGCCTGCTGGGCTATGCCCGCGTCAGCACCGACGACCAGG  
ACTTGACCAACCAACGGGCCGAAGTGCACGCGGCCGGCTGCAC  
CAAGCTGTTTTCCGAGAAGATCACCGGCACAGGCGCGACCGCC  
CGGAGCTGGCCAGGATGCTTGACCACCTACGCCCTGGCGACGTT  
GTGACAGTGACCAGGCTAGACCGCCTGGCCCGCAGCACCCGCG  
ACCTACTGGACATTGCCGAGCGCATCCAGGAGGCGCGCGGG  
CCTGCGTAGCCTGGCAGAGCCGTGGGCGGACACCACCGCCG  
GCCGGCCGCATGGTGTTGACCGTGTTCCGCGCATTGCCGAGTTC  
GAGCGTTCCTAATCATCGACCGCACCCGGAGCGGGCGCGAGG  
CCGCCAAGGCCCGAGGCGTGAAGTTTGGCCCCCGCCCTACCTC  
ACCCCGGCACAGATCGCGCACGCCCGCGAGCTGATCGACCAGG  
AAGGCCGCACCGTGAAAGAGGCGGCTGCACTGCTTGGCGTG CAT  
CGCTCGACCCTGTACCGCGCACTTGAGCGCAGCGAGGAAGTGAC  
GCCACCGAGGCCAGGCGGCGCGGTGCCTTCCGTGAGGACGCAT

---

TGACCGAGGCCGACGCCCTGGCGGCCGCCGAGAATGAACGCCA  
AGAGGAACAAGCATGAAACCGCACCAGGACGGCCAGGACGAA  
CCGTTTTTCATTACCGAAGAGATCGAGGCGGAGATGATCGCGGC  
CGGGTACGTGTTTCGAGCCGCCCGCGCACGTCTCAACCGTGCGGC  
TGCATGAAATCCTGGCCGGTTTGTCTGATGCCAAGCTGGCGGCCT  
GGCCGGCCAGCTTGGCCGCTGAAGAAACCGAGCGCCGCCGTCT  
AAAAAGGTGATGTGTATTTGAGTAAAACAGCTTGCGTCATGCGG  
TCGCTGCGTATATGATGCGATGAGTAAATAAACAAATACGCAAG  
GGGAACGCATGAAGGTTATCGCTGTACTTAACCAGAAAGGCGG  
GTCAGGCAAGACGACCATCGCAACCCATCTAGCCCGCGCCCTGC  
AACTCGCCGGGGCCGATGTTCTGTTAGTCGATTCCGATCCCCAGG  
GCAGTGCCCGCGATTGGGCGGCCGTGCGGGAAGATCAACCGCT  
AACCGTTGTCCGCATCGACCGCCCGACGATTGACCGCGACGTGA  
AGGCCATCGGCCGGCGCGACTTCGTAGTGATCGACGGAGCGCCC  
CAGGCGGCGGACTTGGCTGTGTCCGCGATCAAGGCAGCCGACTT  
CGTGCTGATTCCGGTGCAGCCAAGCCCTTACGACATATGGGCCA  
CCGCCGACCTGGTGGAGCTGGTTAAGCAGCGCATTGAGGTCACG  
GATGGAAGGCTACAAGCGGCCTTTGTCGTGTCGCGGGCGATCAA  
AGGCACGCGCATCGGCCGTGAGGTTGCCGAGGCGCTGGCCGGG  
TACGAGCTGCCCATTCTTGAGTCCCGTATCACGCAGCGCGTGAG  
CTACCCAGGCACTGCCGCCGCCGGCACAACCGTTCTTGAATCAG  
AACCCGAGGGCGACGCTGCCCGCGAGGTCCAGGCGCTGGCCGC  
TGAAATTAAATCAAACTCATTTGAGTTAATGAGGTAAAGAGAA  
AATGAGCAAAAAGCACAAACACGCTAAGTGCCGGCCGTCCGAGC  
GCACGCAGCAGCAAGGCTGCAACGTTGGCCAGCCTGGCAGACA  
CGCCAGCCATGAAGCGGGTCAACTTTCAGTTGCCGGCGGAGGAT  
CACACCAAGCTGAAGATGTACGCGGTACGCCAAGGCAAGACCA  
TTACCGAGCTGCTATCTGAATACATCGCGCAGCTACCAGAGTAA  
ATGAGCAAATGAATAAATGAGTAGATGAATTTAGCGGCTAAAG  
GAGGCGGCATGGAATAATCAAGAACAACCAGGCACCGACGCCGT  
GGAATGCCCCATGTGTGGAGGAACGGGCGGTTGGCCAGGCGTA  
AGCGGCTGGGTTGTCTGCCGGCCCTGCAATGGCACTGGAACCCC  
CAAGCCCCGAGGAATCGGCGTGAGCGGTGCGAAACCATCCGGCC  
CGGTACAAATCGGCGCGGCGCTGGGTGATGACCTGGTGAGAA  
GTTGAAGGCCGCGCAGGCCGCCAGCGGCAACGCATCGAGGCA  
GAAGCACGCCCCGGTGAATCGTGGCAAGCGGCCGCTGATCGAA  
TCCGCAAAGAATCCCGGCAACCGCCGGCAGCCGGTGCGCCGTC  
GATTAGGAAGCCGCCCAAGGGCGACGAGCAACCAGATTTTTTCG  
TTCCGATGCTCTATGACGTGGGCACCCGCGATAGTCGCAGCATC  
ATGGACGTGGCCGTTTTCCGTCTGTGCAAGCGTGACCGACGAGC  
TGGCGAGGTGATCCGCTACGAGCTTCCAGACGGGCACGTAGAG  
GTTTCCGCAGGGCCGGCCGGCATGGCCAGTGTGTGGGATTACGA  
CCTGGTACTGATGGCGGTTTCCCATCTAACCGAATCCATGAACC  
GATACCGGGAAGGGAAGGGAGACAAGCCCGGCCGCGTGTTCCG

---

TCCACACGTTGCGGACGTACTCAAGTTCTGCCGGCGAGCCGATG  
GCGGAAAGCAGAAAGACGACCTGGTAGAAACCTGCATTCCGTT  
AAACACCACGCACGTTGCCATGCAGCGTACGAAGAAGGCCAAG  
AACGGCCGCTGGTGACGGTATCCGAGGGTGAAGCCTTGATTAG  
CCGCTACAAGATCGTAAAGAGCGAAACCGGGCGGCCGGAGTAC  
ATCGAGATCGAGCTAGCTGATTGGATGTACCGCGAGATCACAGA  
AGGCAAGAACCCGGACGTGCTGACGGTTCACCCCGATTACTTTT  
TGATCGATCCCCGCATCGGCCGTTTTCTCTACCGCCTGGCACGCC  
GCGCCGACAGGCAAGGCAGAAGCCAGATGGTTGTTCAAGACGAT  
CTACGAACGCAGTGGCAGCGCCGGAGAGTTCAAGAAGTTCTGTT  
TCACCGTGCGCAAGCTGATCGGGTCAAATGACCTGCCGGAGTAC  
GATTTGAAGGAGGAGGCGGGGCAGGCTGGCCCGATCCTAGTCAT  
GCGCTACCGCAACCTGATCGAGGGCGAAGCATCCGCCGGTTCCCT  
AATGTACGGAGCAGATGCTAGGGCAAATTGCCCTAGCAGGGGA  
AAAAGGTCGAAAAGGTCTCTTCCCTGTGGATAGCACGTACATTG  
GGAACCCAAAGCCGTACATTGGGAACCGGAACCCGTACATTGG  
GAACCCAAAGCCGTACATTGGGAACCGGTCACACATGTAAGTG  
ACTGATATAAAAGAGAAAAAAGGCGATTTTTCCGCCTAAAACTC  
TTTAAAACTTATTA AAAACTCTTAAAACCCGCCTGGCCTGTGCATA  
ACTGTCTGGCCAGCGCACAGCCGAAGAGCTGCAAAAAGCGCCT  
ACCCTTCGGTCGCTGCGCTCCCTACGCCCCGCCGCTTCGCGTCGG  
CCTATCGCGGCCGCTGGCCGCTCAAAAATGGCTGGCCTACGGCC  
AGGCAATCTACCAGGGCGCGGACAAGCCGCGCCGTCGCCACTC  
GACCGCCGGCGCCCACATCAAGGCACCCTGCCTCGCGCGTTTTCG  
GTGATGACGGTGAAAACCTCTGACACATGCAGCTCCCGGAGACG  
GTCACAGCTTGTCTGTAAGCGGATGCCGGGAGCAGACAAGCCCG  
TCAGGGCGCGTCAGCGGGTGTGGCGGGTGTGGGGGCGCAGCCA  
TGACCCAGTCACGTAGCGATAGCGGAGTGTA TACTGGCTTA ACT  
ATGCGGCATCAGAGCAGATTG TACTGAGAGTGCACCATATGCGG  
TGTGAAATACCGCACAGATGCGTAAGGAGAAAAATACCGCATCA  
GGCGCTCTTCCGCTTCCTCGCTCACTGACTCGCTGCGCTCGGTG  
TTCGGCTGCGGCGAGCGGTATCAGCTCACTCAAAGGCGGTAATA  
CGGTTATCCACAGAATCAGGGGATAACGCAGGAAAGAACATGT  
GAGCAAAAGGCCAGCAAAAGGCCAGGAACCGTAAAAAGGCCG  
CGTTGCTGGCGTTTTTCCATAGGCTCCGCCCCCTGACGAGCATC  
ACAAAAATCGACGCTCAAGTCAGAGGTGGCGAAACCCGACAGG  
ACTATAAAGATAACCAGGCGTTTCCCCCTGGAAGCTCCCTCGTGC  
GCTCTCCTGTTCCGACCCTGCCGCTTACCGGATACCTGTCCGCCT  
TTCTCCCTTCGGGAAGCGTGCGCCTTTCTCATAGCTCACGCTGTA  
GGTATCTCAGTTCCGTGTAGGTCGTTGCTCCAAGCTGGGCTGTG  
TGCACGAACCCCCCGTTAGCCCGACCGCTGCGCCTTATCCGGT  
AACTATCGTCTTGAGTCCAACCCGTAAGACACGACTTATCGCC  
ACTGGCAGCAGCCACTGGTAACAGGATTAGCAGAGCGAGGTAT  
GTAGGCGGTGCTACAGAGTTCTTGAAGTGGTGGCCTAACTACGG

---



CTACACTAGAAGGACAGTATTTGGTATCTGCGCTCTGCTGAAGC  
 CAGTTACCTTCGGAAAAAGAGTTGGTAGCTCTTGATCCGGCAAA  
 CAAACCACCGCTGGTAGCGGTGGTTTTTTTGTGTTGCAAGCAGCAG  
 ATTACGCGCAGAAAAAAGGATCTCAAGAAGATCCTTTGATCTT  
 TTCTACGGGGTCTGACGCTCAGTGGAACGAAAACCTCACGTTAAG  
 GGATTTTGGTCATGCATTCTAGGTACTAAAAACAATTCATCCAGTA  
 AAATATAATATTTTATTTTCTCCCAATCAGGCTTGATCCCCAGTA  
 AGTCAAAAAATAGCTCGACATACTGTTCTTCCCCGATATCCTCCC  
 TGATCGACCGGACGCAGAAAGGCAATGTCATACCACTTGTCGGCC  
 CTGCCGCTTCTCCAAGATCAATAAAGCCACTTACTTTGCCATCT  
 TTCACAAAGATGTTGCTGTCTCCCAGGTCGCCGTGGGAAAAGAC  
 AAGTTCCTCTTCGGGCTTTTCCGTCTTTAAAAAATCATACAGCTC  
 GCGCGGATCTTTAAATGGAGTGTCTTCTTCCCAGTTTCGCAATC  
 CACATCGGCCAGATCGTTATTCAGTAAGTAATCCAATTCGGCTA  
 AGCGGCTGTCTAAGCTATTCGTATAGGGACAATCCGATATGTCG  
 ATGGAGTGAAAGAGCCTGATGCACTCCGCATACAGCTCGATAAT  
 CTTTTCAGGGCTTTGTTTCATCTTCATACTCTTCCGAGCAAAGGAC  
 GCCATCGGCCTCACTCATGAGCAGATTGCTCCAGCCATCATGCC  
 GTTCAAAGTGCAGGACCTTTGGAACAGGCAGCTTTCCTTCCAGC  
 CATAGCATCATGTCCTTTTCCCGTCCACATCATAGGTGGTCCCTT  
 TATACCGGCTGTCCGTCATTTTAAATATAGGTTTTCATTTTCTCC  
 CACCAGCTTATATACCTTAGCAGGAGACATTCCTTCCGTATCTTT  
 TACGCAGCGGTATTTTTCGATCAGTTTTTCAATTCCGGTGATATT  
 CTCATTTTAGCCATTTATTATTTCTTCTCTTTTCTACAGTATTTA  
 AAGATACCCCAAGAAGCTAATTATAACAAGACGAACTCCAATT  
 CACTGTTCTTGCATTCTAAAACCTTAAATACCAGAAAACAGCTT  
 TTTCAAAGTTGTTTTCAAAGTTGGCGTATAACATAGTATCGACGG  
 AGCCGATTTTGAAACCGCGGTGATCACAGGCAGCAACGCTCTGT  
 CATCGTTACAATCAACATGCTACCCTCCGCGAGATCATCCGTGTT  
 TCAAACCCGGCAGCTTAGTTGCCGTTCTTCCGAATAGCATCGGTA  
 ACATGAGCAAAGTCTGCCGCTTACAACGGCTCTCCCGCTGACG  
 CCGTCCCGGACTGATGGGCTGCCTGTATCGAGTGGTGATTTGTG  
 CCGAGCTGCCGGTCGGGGAGCTGTTGGCTGGCTGGTGGCAGGAT  
 ATATTGTGGTGTAACAATTGACGCTTAGACAACCTTAATAACA  
 CATTGCGGACGT

**Table S2.** Codon frequency table of *Lactuca sativa*.

| Codon | RSCU  | Codon | RSCU  | Codon | RSCU  | Codon | RSCU  |
|-------|-------|-------|-------|-------|-------|-------|-------|
| TTT   | 0.529 | TTC   | 0.471 | TTA   | 0.163 | TTG   | 0.244 |
| TCT   | 0.230 | TCC   | 0.159 | TCA   | 0.228 | TCG   | 0.091 |
| TAT   | 0.566 | TAC   | 0.434 | TAA   | 0.389 | TAG   | 0.167 |
| TGT   | 0.584 | TGC   | 0.416 | TGA   | 0.444 | TGG   | 1.000 |

|     |       |     |       |     |       |     |       |
|-----|-------|-----|-------|-----|-------|-----|-------|
| CTT | 0.264 | CTC | 0.140 | CTA | 0.113 | CTG | 0.076 |
| CCT | 0.330 | CCC | 0.159 | CCA | 0.372 | CCG | 0.139 |
| CAT | 0.641 | CAC | 0.359 | CAA | 0.702 | CAG | 0.298 |
| CGT | 0.145 | CGC | 0.068 | CGA | 0.129 | CGG | 0.079 |
| ATT | 0.423 | ATC | 0.324 | ATA | 0.253 | ATG | 1.000 |
| ACT | 0.282 | ACC | 0.242 | ACA | 0.377 | ACG | 0.098 |
| AAT | 0.542 | AAC | 0.458 | AAA | 0.540 | AAG | 0.460 |
| AGT | 0.171 | AGC | 0.121 | AGA | 0.363 | AGG | 0.215 |
| GTT | 0.397 | GTC | 0.173 | GTA | 0.156 | GTG | 0.274 |
| GCT | 0.347 | GCC | 0.190 | GCA | 0.348 | GCG | 0.115 |
| GAT | 0.687 | GAC | 0.313 | GAA | 0.585 | GAG | 0.415 |
| GGT | 0.335 | GGC | 0.140 | GGA | 0.340 | GGG | 0.185 |

---

Table S3. Product testing in the p1300BR plasmid.

| Original number | Test samples         | Test samples       | Lutein                |                       | $\beta$ -Carotene     |                       | Zeaxanthin            |                       | $\beta$ -cryptoxanthin |                       | Lycopene              |                       | $\alpha$ -Carotene    |                       |
|-----------------|----------------------|--------------------|-----------------------|-----------------------|-----------------------|-----------------------|-----------------------|-----------------------|------------------------|-----------------------|-----------------------|-----------------------|-----------------------|-----------------------|
|                 | Dilution volume (mL) | Sample quality (g) | Concentration (ng/mL) | Sample content (ng/g) | Concentration (ng/mL) | Sample content (ng/g) | Concentration (ng/mL) | Sample content (ng/g) | Concentration (ng/mL)  | Sample content (ng/g) | Concentration (ng/mL) | Sample content (ng/g) | Concentration (ng/mL) | Sample content (ng/g) |
| Mock p1300 BR   | 0.500                | 0.510              | 3333.81               | 3267.160              | 39.91                 | 39.112                | 3768.07               | 3692.738              | 94.25                  | 92.366                | 40.61                 | 39.798                | 41.33                 | 40.504                |
|                 | 0.500                | 0.511              | 193.6                 | 189.284               | 4.14                  | 4.048                 | 6318.08               | 6177.239              | 17.66                  | 17.266                | 4.53                  | 4.429                 | 7.57                  | 7.401                 |

| Original number | Phytoene              |                       | Violaxanthin          |                       | Capsorubin            |                       | Capsanthin            |                       | Astaxanthin           |                       | Astaxanthin           |                       | Antheraxanthin        |                       |
|-----------------|-----------------------|-----------------------|-----------------------|-----------------------|-----------------------|-----------------------|-----------------------|-----------------------|-----------------------|-----------------------|-----------------------|-----------------------|-----------------------|-----------------------|
|                 | Concentration (ng/mL) | Sample content (ng/g) |
| Mock p1300BR    | 8.88                  | 8.702                 | 1863.26               | 1826.009              | 102.37                | 100.323               | 1234.06               | 1209.388              | 724.74                | 710.251               | 648.530               | 635.564               | 455.539               | 446.432               |
|                 | 0.98                  | 0.958                 | 359.83                | 351.809               | 251.47                | 245.864               | 19042.59              | 18618.097             | 741.51                | 724.980               | 663.663               | 648.869               | 286.326               | 279.943               |

**Table S4.** List of all primers used in this study.

| Name | aim of use                                              | Sequence (5'-3')                                    |
|------|---------------------------------------------------------|-----------------------------------------------------|
| crtF | 35S:TP:CrtW (cloning site: <i>Pst</i> I+ <i>Sac</i> I)  | <u>ATTCGTACGACCCTCCTGCAGTGAGACTTTTCAACAAAGGGTA</u>  |
| crtR |                                                         | <u>TTGTGATGTCACTTCGAGCTCTCATTAAAGATTCACCTCTCCA</u>  |
| cZF  | rbcs:TP:CrtZ (cloning site: <i>Pst</i> I+ <i>Sac</i> I) | <u>ATTCGTACGACCCTCCTGCAGTGTGGGAACGAGATAAGGGCG</u>   |
| cZR  |                                                         | <u>TTGTGATGTCACTTCGAGCTC</u> TCATTAAAGCTCCTGAACTACT |
| L5F  | qRT-PCR for Psy gene (GeneBank no:X68017.1)             | TGGTGCAGGAGAACAGACGAACTT                            |
| L5R  |                                                         | AGCAGCATCGAGCATGTCAAATGG                            |
| L6F  | qRT-PCR for CrtZ0 gene (GeneBank no:Y09225.1)           | TCCCGTGCCATTTGTCTCCAGC                              |
| L6R  |                                                         | GCACAAAGCAAGCAGCCAACCT                              |
| L7F  | qRT-PCR for Lcyb gene (GeneBank no:X86221.1)            | AGTTGTTGGAATTGGTGGCACAGC                            |
| L7R  |                                                         | TTATGGCATTGGCAACGACAGGAG                            |
| L8F  | qRT-PCR for Ccs gene (GeneBank no:X76165.1)             | TTAGCACCCACATCAAAGCCAGAG                            |
| L8R  |                                                         | TGGTGAAGGGTCAACGCAACATAC                            |
| L9F  | qRT-PCR for Ubi gene (GeneBank no:AY486137.1)           | GAGCAGTGGAGTCCAGCATTAAACC                           |
| L9R  |                                                         | TTCTGAGTCCAGCTACGAGCAGTG                            |
| L10F | qRT-PCR for CrtW gene                                   | CTCCAGGAAGGCCAAGGCTTAATG                            |
| L10R |                                                         | CAGTACCAGGTGCAGCATGATGAG                            |
| L11F | qRT-PCR for CrtW gene                                   | GTTATGGTGGCAGTGGGACTTCATC                           |
| L11R |                                                         | GCCTATGTGCTTGTATACGCCTTGT                           |
